# Supplementary material for: Discrimination of colon cancer stem cells using noncanonical amino acid
Source: Royal Society of Chemistry journal article supplement (doi:10.1039/c2cc33776b), 2012-01-01
Supplement: c2cc33776b.pdf [file c2cc33776b.pdf]

# Discrimination of colon cancer stem cells using noncanonical amino acid

Xinrui Duan<sup>a</sup>, Honglin Li<sup>a</sup>, Hexin Chen<sup>b</sup> and Qian Wang<sup>\*a</sup>

<sup>a</sup> Department of Chemistry and Biochemistry & Nanocenter  
University of South Carolina, Columbia, SC 29208 (USA)  
E-mail: WANG263@mailbox.sc.edu

<sup>b</sup> Department of Biology, University of South Carolina  
Columbia, SC 29208 (USA)

## Supplementary Information

### Contents

|                                     |   |
|-------------------------------------|---|
| 1. CSCs proportion in HCT-116 ..... | 2 |
| 2. Experimental section .....       | 2 |
| Cell culture:.....                  | 2 |
| HPG labeling: .....                 | 2 |
| Fluorescence microscopy: .....      | 2 |
| FACS and Flow cytometry:.....       | 2 |
| 3. Reference .....                  | 3 |

## 1. CSCs proportion in HCT-116

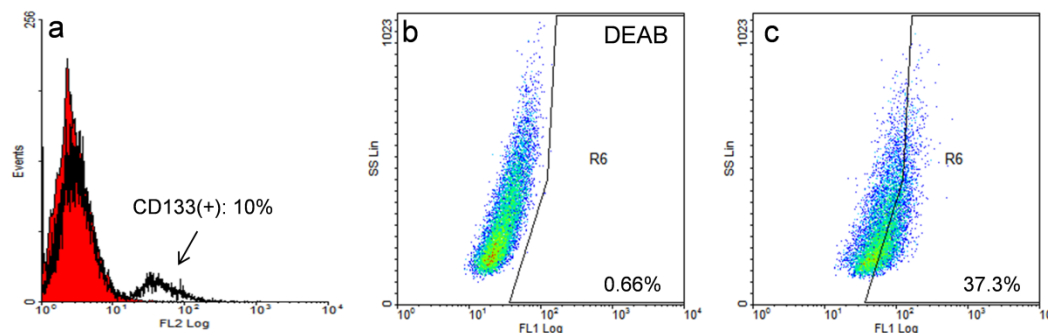

Figure S1 CSCs proportion in HCT-116 by using CD133 (a) and ALDEFLOUR assay (b, c).

## 2. Experimental section

### Cell culture:

Colon cancer cell line HCT-116 was obtained from ATCC. Cells were maintained in Dulbecco's modified Eagle's medium (DMEM) and supplemented with 10% fetal bovine serum (FBS), 100 U/mL penicillin, 100 µg/mL streptomycin and 2 mM L-glutamine in a 5% CO<sub>2</sub> humidified incubator at 37°C. All media components were obtained from Hyclone laboratories Inc.

### HPG labeling:

Cells were seeded at estimated 50% coverage on 6-well plate the 12 hours before labeling. HPG Labeling is accounting to our previous reports. In brief, Methionine-free medium supplemented with 2 mM L-glutaMAX replaced the culture medium 30 min before adding 100 µM HPG. After HPG incubation, 100 µM Met was added to medium for chasing and incubated for 2 hours.

### Fluorescence microscopy:

After HPG labeling, Cells were rinsed twice with PBS, fixed with 4% paraformaldehyde and permeabilized with 0.1% Triton X-100 for 10 min. Cells were treated with blocking solution (1% BSA in PBS) at least 1 hour and rinsed twice with PBS. Cells were stained with 3-azido-7-hydroxycoumarin in the presence of 200 µM CuSO<sub>4</sub>, 400µM TBTA, and 500 µM Sodium ascorbate in PBS(pH 7.4). The fluorescence was visualized under microscope (Olympus IX81) with DAPI filter set. Mercury lamp was used as a light source.

### FACS and Flow cytometry:

**FACS** Cells were detached by Accutase (Invitrogen Inc). CD133 and ALDH1 enzyme activity was tested by using PE conjugated Anti-CD133 (Miltenyi Biotec) and ALDEFLOUR assay kit (STEMCELL Technologies, BC, Canada) according to manufacturer's manual. Each sample was filtered through a 40 µm Cell Strainers (Fisher Scientific Inc, GA) before sorting. Cells were sorted on BD FACSaria II cell sorter at 4 °C.

### Flow cytometry

In brief, after HPG labelling cells were detached by Accutase (Invitrogen Inc). cells were rinsed with PBS and stain with primary anti-CD133 antibody and secondary anti-mouse FITC antibody. Then cells were fixed with 4% paraformaldehyde and were permeabilized with 0.1% Triton X-100 for 15 min each. Cells were treated with blocking solution (100 mM glycine in PBS) at least 1 hour. Cells were stained with 2  $\mu\text{M}$  azido-Cy5 in the presence of 50  $\mu\text{M}$   $\text{CuSO}_4$ , 50  $\mu\text{M}$  L-histidine, 500  $\mu\text{M}$  Sodium ascorbate in PBS (pH 7.4) <sup>2</sup>. Then samples were washed with PBS with 0.5% tween 20 three times. Each sample was filtered through a 40  $\mu\text{m}$  Cell Strainers (Fisher Scientific Inc, GA) before analysis on Beckman Coulter FC500 Flow Cytometers.

### 3. Reference

1. K. E. Beatty, J. C. Liu, F. Xie, D. C. Dieterich, E. M. Schuman, Q. Wang and D. A. Tirrell, *Angew. Chem. Int. Ed.*, 2006, 45, 7364-7367.
2. D. C. Kennedy, C. S. McKay, M. C. B. Legault, D. C. Danielson, J. A. Blake, A. F. Pegoraro, A. Stolow, Z. Mester, and J. P. Pezacki, *J. Am. Chem. Soc.* 2011, 133, 17993-18001.
